# Supplementary material for: P-tau217 and other blood biomarkers of dementia: variation with time of day
Source: bioRxiv or medRxiv preprint supplement (doi:10.1101/2023.12.11.23299805), 2023-12-11
Supplement: Supplementary file [file media-1.pdf]

## Supplementary tables

**Supplementary Table 1.** Mixed model results including age, sex, BMI, PSQI, and AHI in the model for the nine-time points.

| Variable  | Main effect (N = 21) |              |               |       |               |       |               |       |               |       |               |              |              |                  |               |       |
|-----------|----------------------|--------------|---------------|-------|---------------|-------|---------------|-------|---------------|-------|---------------|--------------|--------------|------------------|---------------|-------|
|           | Age                  |              | Sex           |       | BMI           |       | PSQI          |       | AHI           |       | Group         |              | Time         |                  | Group*Time    |       |
|           | F (DF)               | p            | F (DF)        | p     | F (DF)        | p     | F (DF)        | p     | F (DF)        | p     | F (DF)        | p            | F (DF)       | p                | F (DF)        | p     |
| P-tau217  | 0.23 (1,12.9)        | 0.640        | 2.01 (1,12.9) | 0.180 | 0.23 (1,12.9) | 0.639 | 0.77 (1,13)   | 0.396 | 0.13 (1,12.9) | 0.722 | 6.06 (2,13)   | <b>0.014</b> | 4.28 (8,21)  | <b>0.0001</b>    | 1.28 (16,121) | 0.219 |
| Aβ40      | 1.77 (1,12.9)        | 0.206        | 0.04 (1,12.9) | 0.841 | 1.12 (1,12.9) | 0.310 | 0.03 (1,12.9) | 0.856 | 1.94 (1,12.9) | 0.187 | 0.1 (2,12.9)  | 0.903        | 4.8 (8,121)  | <b>&lt;.0001</b> | 0.92 (16,121) | 0.553 |
| Aβ42      | 1.48 (1,12.9)        | 0.246        | 0.16 (1,12.9) | 0.694 | 2.02 (1,12.9) | 0.179 | 0.99 (1,12.9) | 0.339 | 1.13 (1,12.9) | 0.308 | 0.51 (2,12.9) | 0.614        | 6.41 (8,121) | <b>&lt;.0001</b> | 0.66 (16,121) | 0.830 |
| Aβ42/Aβ40 | 0.22 (1,13)          | 0.644        | 0.25 (1,13)   | 0.626 | 0.14 (1,13)   | 0.718 | 1.38 (1,13)   | 0.261 | 0.64 (1,13)   | 0.438 | 0.79 (2,13)   | 0.473        | 3.01 (8,21)  | <b>0.004</b>     | 0.99 (16,121) | 0.470 |
| GFAP      | 5.45 (1,12.9)        | <b>0.036</b> | 0.95 (1,12.9) | 0.349 | 0.04 (1,12.9) | 0.841 | 0.19 (1,12.9) | 0.669 | 0.48 (1,12.9) | 0.499 | 1.04 (2,12.9) | 0.383        | 1.88 (8,21)  | 0.069            | 1.25 (16,121) | 0.242 |
| NfL       | 3.94 (1,13)          | 0.069        | 4.3 (1,13)    | 0.059 | 0.18 (1,13)   | 0.677 | 0.31 (1,13)   | 0.586 | 0.61 (1,13)   | 0.449 | 0.31 (2,13)   | 0.742        | 2.05 (8,21)  | <b>0.046</b>     | 0.91 (16,121) | 0.557 |

**Supplementary Table 2.** Mixed model results including age, sex, BMI, PSQI, and AHI in the model for evening and morning time points.

| Variable  | N  | Main effect    |              |               |       |               |       |               |       |               |       |               |              |               |               |               |              |
|-----------|----|----------------|--------------|---------------|-------|---------------|-------|---------------|-------|---------------|-------|---------------|--------------|---------------|---------------|---------------|--------------|
|           |    | Age            |              | Sex           |       | BMI           |       | PSQI          |       | AHI           |       | Group         |              | Time          |               | Group*Time    |              |
|           |    | F (DF)         | p            | F (DF)        | p     | F (DF)        | p     | F (DF)        | p     | F (DF)        | p     | F (DF)        | p            | F (DF)        | p             | F (DF)        | p            |
| P-tau217  | 21 | 0.22 (1,12.9)  | 0.647        | 2.38 (1,13)   | 0.147 | 0.1 (1,12.9)  | 0.757 | 0.76 (1,12.9) | 0.399 | 0.05 (1,12.9) | 0.819 | 5.23 (2,12.9) | <b>0.022</b> | 7.84 (1,17)   | <b>0.0123</b> | 3.7 (2,17)    | <b>0.046</b> |
| Aβ40      | 38 | 0.9 (1,29)     | 0.350        | 0.11 (1,29.3) | 0.744 | 0.75 (1,29)   | 0.393 | 0.02 (1,29)   | 0.883 | 0.07 (1,29)   | 0.795 | 0.66 (2,29.2) | 0.523        | 3.91 (1,32.7) | 0.0566        | 0.43 (2,32.7) | 0.657        |
| Aβ42      | 38 | 0.06 (1,29.4)  | 0.804        | 0.04 (1,29.6) | 0.843 | 1.96 (1,29.4) | 0.172 | 0.26 (1,29.4) | 0.614 | 0 (1,29.4)    | 0.963 | 0.47 (2,29.6) | 0.632        | 1.87 (1,32.8) | 0.1806        | 0.54 (2,32.8) | 0.589        |
| Aβ42/Aβ40 | 38 | 0.56 (1,29.8)  | 0.459        | 0.04 (1,30)   | 0.836 | 0.67 (1,29.8) | 0.420 | 0.88 (1,29.8) | 0.356 | 0.06 (1,29.8) | 0.807 | 0.07 (2,29.9) | 0.937        | 1.4 (1,33.1)  | 0.245         | 0.17 (2,33.1) | 0.843        |
| GFAP      | 38 | 8.73 (1,29.4)  | <b>0.006</b> | 0 (1,29.4)    | 0.957 | 0.01 (1,29.4) | 0.921 | 0.08 (1,29.4) | 0.784 | 0.03 (1,29.4) | 0.862 | 0.62 (1,29.4) | 0.546        | 2.78 (1,29.4) | 0.105         | 2.75 (1,29.4) | 0.079        |
| NfL       | 38 | 11.44 (1,29.9) | 0.002        | 1.34 (1,30)   | 0.256 | 0.43 (1,29.9) | 0.516 | 0.16 (1,29.9) | 0.694 | 0.07 (1,30)   | 0.800 | 0.71 (2,30)   | 0.500        | 0.28 (1,33.3) | 0.599         | 0.71 (2,33.3) | 0.500        |
